# Supplementary material
Source: publisher figshare collection journal article supplement (https://diabetesjournals.figshare.com/ndownloader/files/26835131)
Supplement: Supplementary file 1 [file 26835131]

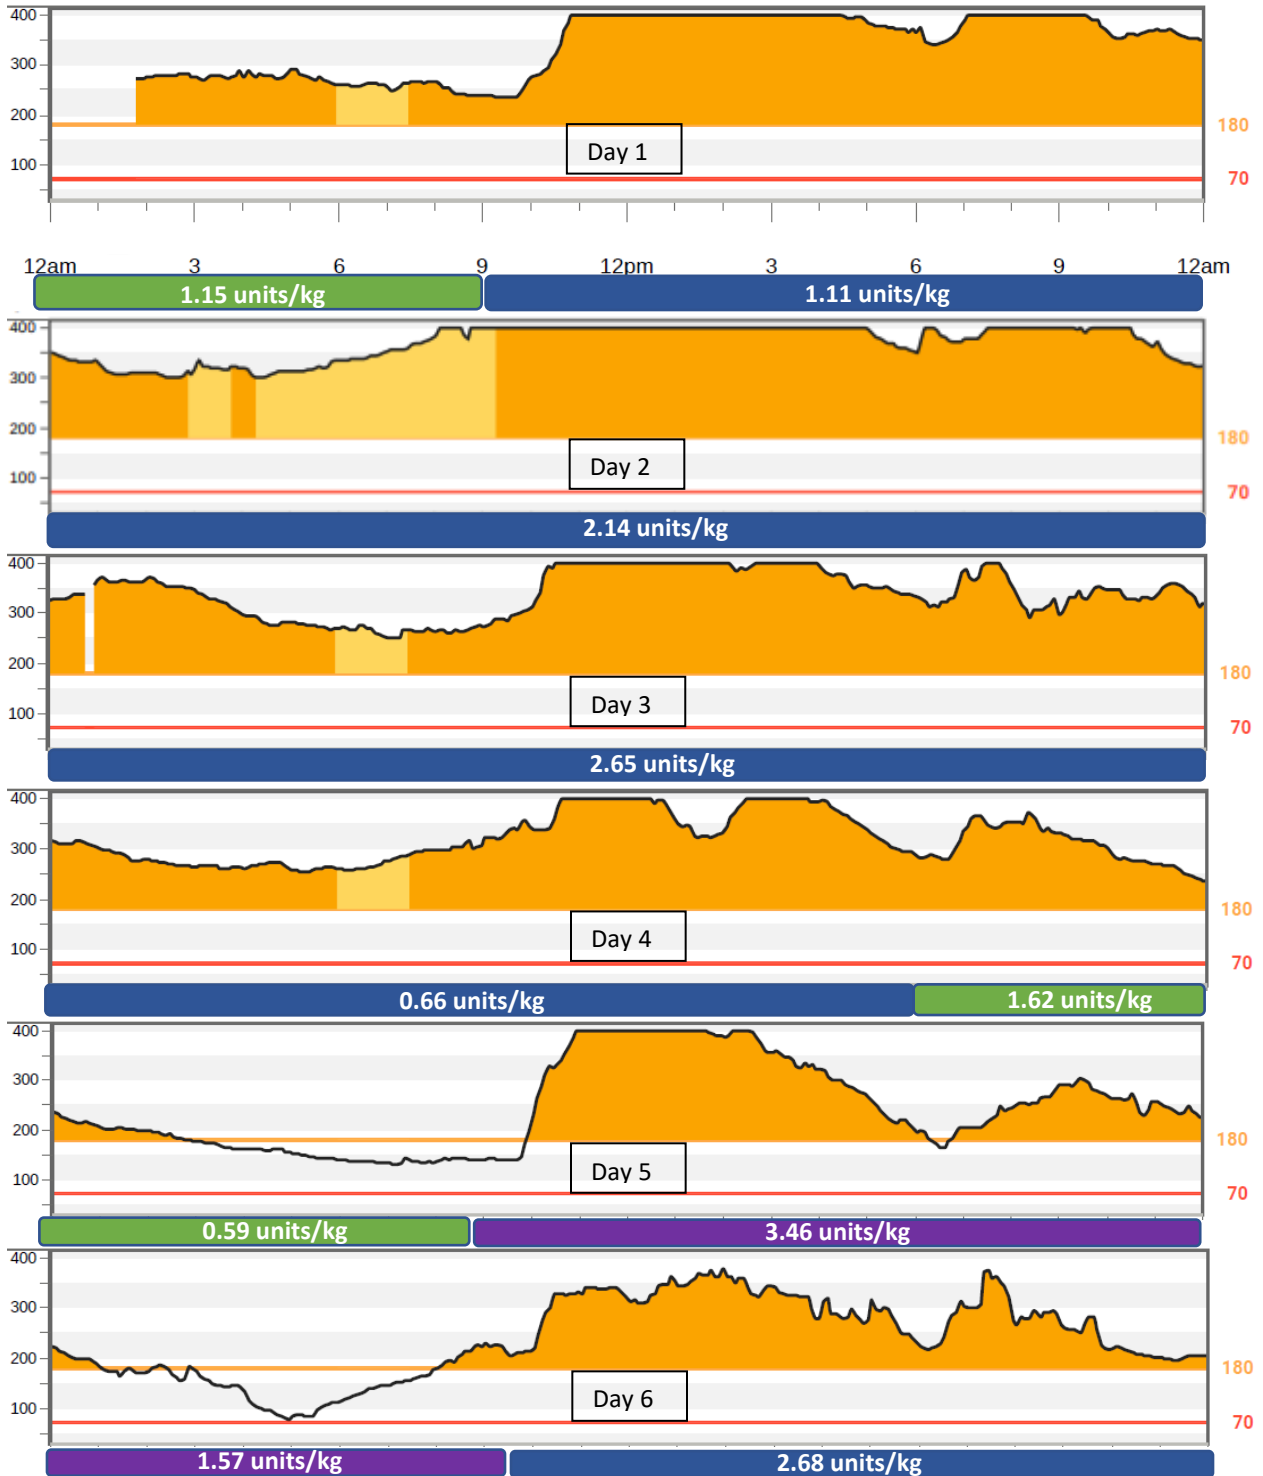

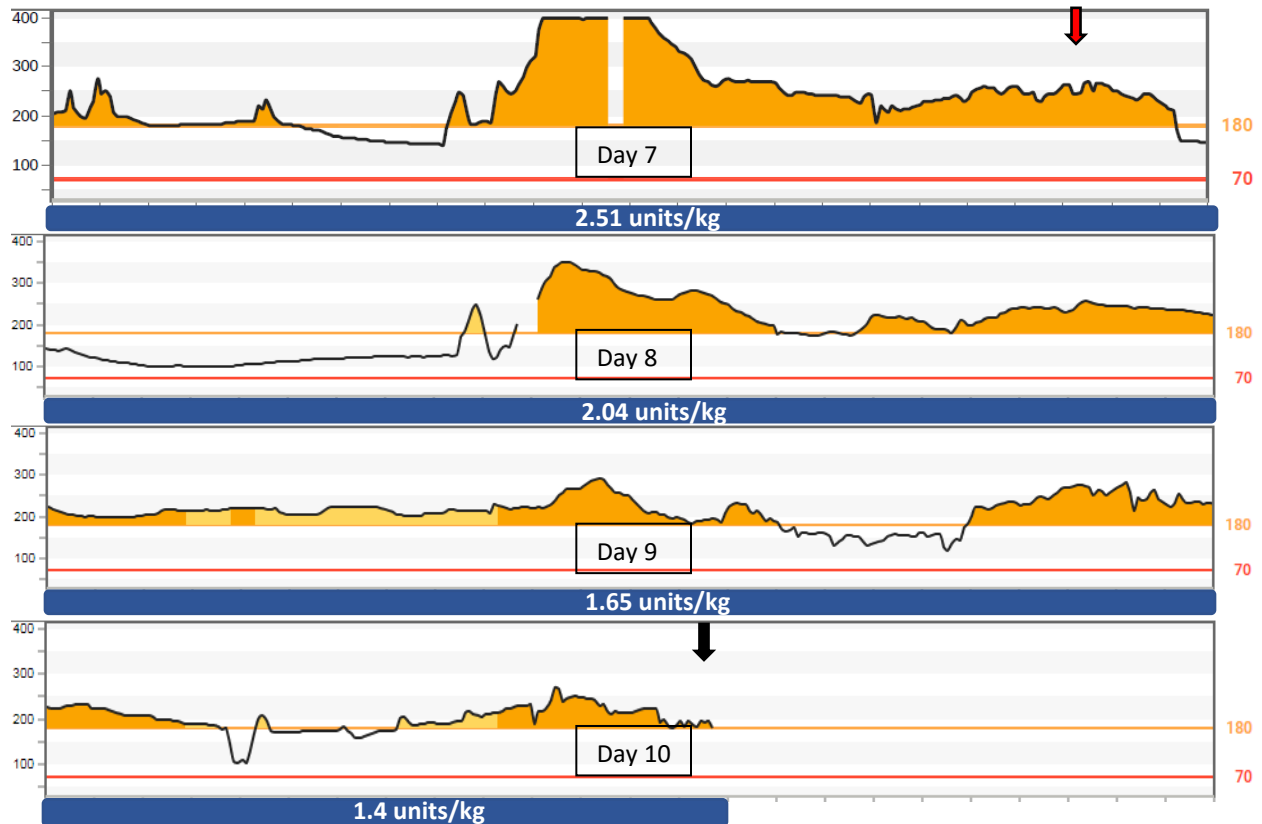

**Supplemental Figure S1.** Continuous glucose monitor tracing and insulin requirements. Green bar shows insulin requirements on a drip and a two-bag system. Blue bar shows insulin requirements on a multiple dose injection regimen. Purple bar shows insulin requirement on an insulin drip, two-bag system and allowing oral feeds with subcutaneous short-acting insulin coverage. Red arrow marks the initiation of metformin therapy at a dose of 500 mg BID. Black arrow marks time of discharge.
